# Supplementary material for: Age-dependent effects of a high-fat diet combined with dietary advanced glycation end products on cognitive function and protection with voluntary exercise
Source: Royal Society of Chemistry journal article supplement (doi:10.1039/d1fo03241k), 2022-01-01
Supplement: d1fo03241k1.pdf [file d1fo03241k1.pdf]

**Table S1** The primer sequences for real-time PCR.

| <b>Genes</b> | <b>Sequence</b>                    |
|--------------|------------------------------------|
| 18S          | F:5'- GCAAGACGGACCAGAGCG-3'        |
|              | R:5'- GTGGTGCCCTTCCGTCAA-3'        |
| Tet2         | F:5'- AGAGAAGACAATCGAGAAGTCGG-3'   |
|              | R:5'- CCTTCCGTACTCCCAAACATCAT-3'   |
| Malat1       | F:5'- CAGTGCTGGGTGGGAATGTA-3'      |
|              | R:5'- CAATCCCACCCCAACAACCTT-3'     |
| Sox2ot       | F:5'- TGGGATGAGTGAAAGCCTCT-3'      |
|              | R:5'- TCTCTCCCATCAGCGTCCT-3'       |
| Gm15477      | F:5'- ACAAACCAGAAAGAGGATTGAAGAT-3' |
|              | R:5'- GCGTGCTGCCATGCTTTA-3'        |
| Snhg1        | F:5'- TTGTGGGTTTACAGAGATGGTG-3'    |
|              | R:5'- CGCAGCTCATTCTTTTCCTC-3'      |

**Table S2 The relative abundance of the top 10 gut bacterial genera at the phylum, class, order, family and genus level (%) (Mean  $\pm$  SEM)**

| <b>level</b>    | <b>CON</b>          | <b>HFD</b>           | <b>AGE</b>            | <b>EX</b>             |
|-----------------|---------------------|----------------------|-----------------------|-----------------------|
| <b>Young</b>    |                     |                      |                       |                       |
| <b>phylum</b>   |                     |                      |                       |                       |
| Actinobacteria  | 0.0098 $\pm$ 0.0022 | 0.0223 $\pm$ 0.0138  | 0.0258 $\pm$ 0.0109   | 0.0324 $\pm$ 0.0101*  |
| Bacteroidetes   | 0.5379 $\pm$ 0.0316 | 0.4053 $\pm$ 0.0625  | 0.3968 $\pm$ 0.0421*  | 0.4592 $\pm$ 0.0361   |
| Deferribacteres | 0.0173 $\pm$ 0.0036 | 0.0358 $\pm$ 0.0044* | 0.0147 $\pm$ 0.0023#  | 0.0163 $\pm$ 0.0053#  |
| Firmicutes      | 0.3346 $\pm$ 0.0221 | 0.4302 $\pm$ 0.0550  | 0.4338 $\pm$ 0.0427*  | 0.3569 $\pm$ 0.0354   |
| Proteobacteria  | 0.0938 $\pm$ 0.0123 | 0.1019 $\pm$ 0.0121  | 0.1270 $\pm$ 0.0162   | 0.1332 $\pm$ 0.0121#  |
| TM7             | UD                  | UD                   | UD                    | 0.0003 $\pm$ 0.0002   |
| Tenericutes     | 0.0001 $\pm$ 0.0001 | 0.00 $\pm$ 0.00      | 0.0003 $\pm$ 0.0002   | 0.0007 $\pm$ 0.0003*# |
| Verrucomicrobia | 0.0035 $\pm$ 0.0021 | 0.0036 $\pm$ 0.0022  | 0.0006 $\pm$ 0.0004*# | UD                    |
| <b>class</b>    |                     |                      |                       |                       |
| Coriobacteria   | 0.0086 $\pm$ 0.0019 | 0.0222 $\pm$ 0.0138  | 0.0248 $\pm$ 0.0106   | 0.0305 $\pm$ 0.0099*  |
| Bacteroidia     | 0.5379 $\pm$ 0.0316 | 0.4053 $\pm$ 0.0625  | 0.3968 $\pm$ 0.0421*  | 0.4592 $\pm$ 0.0361   |
| Deferribacteres | 0.0173 $\pm$ 0.0036 | 0.0358 $\pm$ 0.0044* | 0.0147 $\pm$ 0.0023#  | 0.0163 $\pm$ 0.0053#  |
| Bacilli         | 0.0067 $\pm$ 0.0023 | 0.0011 $\pm$ 0.0005* | 0.0012 $\pm$ 0.0004*  | 0.0049 $\pm$ 0.0026   |

|                       |                 |                  |                               |                                 |
|-----------------------|-----------------|------------------|-------------------------------|---------------------------------|
| Clostridia            | 0.3031 ± 0.0239 | 0.3857 ± 0.0582  | 0.4178 ± 0.0448*              | 0.3338 ± 0.0379                 |
| Erysipelotrichi       | 0.0249 ± 0.0117 | 0.0434 ± 0.0164  | 0.0148 ± 0.0038 <sup>#</sup>  | 0.0181 ± 0.0052                 |
| Betaproteobacteria    | 0.0001 ± 0.0001 | 0.0028 ± 0.0026  | 0.0006 ± 0.0004               | 0.0074 ± 0.0063                 |
| Deltaproteobacteria   | 0.0907 ± 0.0121 | 0.0882 ± 0.0128  | 0.0932 ± 0.0138               | 0.1064 ± 0.0165                 |
| Epsilonproteobacteria | 0.0022 ± 0.0007 | 0.0095 ± 0.0023* | 0.0235 ± 0.0100*              | 0.0021 ± 0.0008 <sup>#</sup> \$ |
| Gammaproteobacteria   | 0.0007 ± 0.0004 | 0.0012 ± 0.0003  | 0.0095 ± 0.0069               | 0.0169 ± 0.0140                 |
| <b>order</b>          |                 |                  |                               |                                 |
| Coriobacteriales      | 0.0086 ± 0.0019 | 0.0222 ± 0.0138  | 0.0248 ± 0.0106               | 0.0305 ± 0.0099*                |
| Bacteroidales         | 0.5379 ± 0.0316 | 0.4053 ± 0.0625  | 0.3968 ± 0.0421*              | 0.4592 ± 0.0361                 |
| Deferribacterales     | 0.0173 ± 0.0036 | 0.0358 ± 0.0044* | 0.0147 ± 0.0023 <sup>#</sup>  | 0.0163 ± 0.0053 <sup>#</sup>    |
| Clostridiales         | 0.3031 ± 0.0239 | 0.3857 ± 0.0582  | 0.4178 ± 0.0448*              | 0.3338 ± 0.0379                 |
| Erysipelotrichales    | 0.0249 ± 0.0117 | 0.0434 ± 0.0164  | 0.0148 ± 0.0038 <sup>#</sup>  | 0.0181 ± 0.0052                 |
| Burkholderiales       | 0.0001 ± 0.0001 | 0.0028 ± 0.0026  | 0.0006 ± 0.0004               | 0.0074 ± 0.0063                 |
| Desulfovibrionales    | 0.0907 ± 0.0121 | 0.0882 ± 0.0128  | 0.0932 ± 0.0138               | 0.1064 ± 0.0165                 |
| Campylobacterales     | 0.0022 ± 0.0007 | 0.0095 ± 0.0023* | 0.0235 ± 0.0100*              | 0.0021 ± 0.0008 <sup>#</sup> \$ |
| Enterobacteriales     | 0.0007 ± 0.0004 | 0.0012 ± 0.0003  | 0.0095 ± 0.0069               | 0.0169 ± 0.0140                 |
| Verrucomicrobiales    | 0.0035 ± 0.0021 | 0.0036 ± 0.0022  | 0.0006 ± 0.0004 <sup>*#</sup> | UD                              |

**family**

|                     |                 |                  |                  |                  |
|---------------------|-----------------|------------------|------------------|------------------|
| Coriobacteriaceae   | 0.0086 ± 0.0019 | 0.0222 ± 0.0138  | 0.0248 ± 0.0106  | 0.0305 ± 0.0099* |
| Bacteroidales       | 0.0716 ± 0.0075 | 0.1447 ± 0.0228* | 0.1234 ± 0.0258  | 0.1108 ± 0.0127* |
| Bacteroidaceae      | 0.0269 ± 0.0116 | 0.1123 ± 0.0390  | 0.0545 ± 0.0208  | 0.0815 ± 0.0145* |
| S24-7               | 0.4131 ± 0.0359 | 0.1085 ± 0.0220* | 0.1646 ± 0.0288* | 0.1513 ± 0.0354* |
| Deferribacteraceae  | 0.0173 ± 0.0036 | 0.0358 ± 0.0044* | 0.0147 ± 0.0023# | 0.0163 ± 0.0053# |
| Clostridiales       | 0.1634 ± 0.0159 | 0.2214 ± 0.0326  | 0.2337 ± 0.0261* | 0.1855 ± 0.0263  |
| Lachnospiraceae     | 0.0303 ± 0.0030 | 0.0500 ± 0.0117  | 0.0552 ± 0.0082* | 0.0424 ± 0.0074  |
| Ruminococcaceae     | 0.0965 ± 0.0099 | 0.0984 ± 0.0185  | 0.1182 ± 0.0157  | 0.0982 ± 0.0132  |
| Erysipelotrichaceae | 0.0249 ± 0.0117 | 0.0434 ± 0.0164  | 0.0148 ± 0.0038# | 0.0181 ± 0.0052  |
| Desulfovibrionaceae | 0.0907 ± 0.0121 | 0.0882 ± 0.0128  | 0.0932 ± 0.0138  | 0.1064 ± 0.0165  |

**genus**

|                |                 |                  |                  |                  |
|----------------|-----------------|------------------|------------------|------------------|
| Coprococcus    | 0.0029 ± 0.0004 | 0.0054 ± 0.0025  | 0.0066 ± 0.0009* | 0.0084 ± 0.0034* |
| Ruminococcus   | 0.0093 ± 0.0014 | 0.0051 ± 0.0012* | 0.0056 ± 0.0009  | 0.0086 ± 0.0017  |
| Helicobacter   | 0.0022 ± 0.0007 | 0.0095 ± 0.0023* | 0.0234 ± 0.0100* | 0.0020 ± 0.0008# |
| [Ruminococcus] | 0.0100 ± 0.0013 | 0.0171 ± 0.0038  | 0.0131 ± 0.0019  | 0.0118 ± 0.0027  |
| Odoribacter    | 0.0120 ± 0.0017 | 0.0143 ± 0.0026  | 0.0245 ± 0.0090  | 0.0218 ± 0.0072  |

|                    |                 |                  |                  |                   |
|--------------------|-----------------|------------------|------------------|-------------------|
| Parabacteroides    | 0.0047 ± 0.0012 | 0.0061 ± 0.0028  | 0.0073 ± 0.0024  | 0.0609 ± 0.0089*# |
| Allobaculum        | 0.0226 ± 0.0119 | 0.0287 ± 0.0150  | 0.0119 ± 0.0039  | 0.0114 ± 0.0038   |
| Mucispirillum      | 0.0173 ± 0.0036 | 0.0358 ± 0.0044* | 0.0147 ± 0.0023# | 0.0163 ± 0.053#   |
| Oscillospira       | 0.0333 ± 0.0030 | 0.0391 ± 0.0079  | 0.0423 ± 0.0074  | 0.0362 ± 0.0071   |
| Bacteroides        | 0.0269 ± 0.0116 | 0.1123 ± 0.0390  | 0.0545 ± 0.0208  | 0.0815 ± 0.0145*  |
| <b>Middle-aged</b> |                 |                  |                  |                   |
| <b>phylum</b>      |                 |                  |                  |                   |
| Actinobacteria     | 0.0180 ± 0.0061 | 0.0093 ± 0.0035  | 0.0036 ± 0.0011* | 0.0158 ± 0.0053   |
| Bacteroidetes      | 0.5563 ± 0.0437 | 0.4266 ± 0.0352* | 0.5026 ± 0.0668  | 0.5235 ± 0.0283   |
| Cyanobacteria      | 0.0013 ± 0.0009 | UD               | UD               | UD                |
| Deferribacteres    | 0.0477 ± 0.0120 | 0.0447 ± 0.0178  | 0.0310 ± 0.0082  | 0.0130 ± 0.0020#  |
| Firmicutes         | 0.3438 ± 0.0363 | 0.4408 ± 0.0440  | 0.4341 ± 0.0573  | 0.4192 ± 0.0276   |
| Fusobacteria       | UD              | UD               | UD               | UD                |
| Proteobacteria     | 0.0298 ± 0.0063 | 0.0739 ± 0.0372  | 0.0249 ± 0.0065  | 0.0249 ± 0.0075   |
| TM7                | 0.0008 ± 0.0002 | 0.0010 ± 0.0005  | 0.0003 ± 0.0002* | 0.0001 ± 0.0001*  |
| Tenericutes        | 0.0011 ± 0.0006 | 0.0010 ± 0.0006  | 0.0012 ± 0.0007  | 0.0016 ± 0.0006   |
| Verrucomicrobia    | UD              | 0.0018 ± 0.0013  | 0.0012 ± 0.0012# | 0.0001 ± 0.0001#  |

**class**

|                       |                 |                  |                   |                    |
|-----------------------|-----------------|------------------|-------------------|--------------------|
| Actinobacteria        | 0.0072 ± 0.0043 | 0.0005 ± 0.0001* | 0.0002 ± 0.0001*# | 0.0006 ± 0.0002*\$ |
| Coriobacteriia        | 0.0109 ± 0.0028 | 0.0088 ± 0.0035  | 0.0035 ± 0.0010*  | 0.0152 ± 0.0053    |
| Bacteroidia           | 0.5563 ± 0.0437 | 0.4266 ± 0.0352* | 0.5026 ± 0.0668   | 0.5235 ± 0.0283    |
| Deferribacteres       | 0.0477 ± 0.0120 | 0.0447 ± 0.0178  | 0.0310 ± 0.0082   | 0.0130 ± 0.0020#   |
| Bacilli               | 0.0043 ± 0.0011 | 0.0011 ± 0.0004* | 0.0022 ± 0.0003#  | 0.0020 ± 0.0003    |
| Clostridia            | 0.2989 ± 0.0408 | 0.4149 ± 0.0480  | 0.4132 ± 0.0574   | 0.3532 ± 0.0335    |
| Erysipelotrichi       | 0.0406 ± 0.0105 | 0.0248 ± 0.0070  | 0.0186 ± 0.0085*  | 0.0640 ± 0.0254\$  |
| Deltaproteobacteria   | 0.0222 ± 0.0054 | 0.0280 ± 0.0077  | 0.0182 ± 0.0041   | 0.0129 ± 0.0036    |
| Epsilonproteobacteria | 0.0044 ± 0.0029 | 0.0441 ± 0.0396  | 0.0036 ± 0.0031   | 0.0031 ± 0.0020    |
| Gammaproteobacteria   | 0.0008 ± 0.0004 | 0.0015 ± 0.0007  | 0.0030 ± 0.0018   | 0.0078 ± 0.0064    |

**order**

|                   |                 |                  |                   |                    |
|-------------------|-----------------|------------------|-------------------|--------------------|
| Bifidobacteriales | 0.0071 ± 0.0043 | 0.0005 ± 0.0001* | 0.0002 ± 0.0001*# | 0.0005 ± 0.0002*\$ |
| Coriobacteriales  | 0.0109 ± 0.0028 | 0.0088 ± 0.0035  | 0.0035 ± 0.0010*  | 0.0152 ± 0.0053    |
| Bacteroidales     | 0.5563 ± 0.0437 | 0.4266 ± 0.0352* | 0.5026 ± 0.0668   | 0.5235 ± 0.0283    |
| Deferribacterales | 0.0477 ± 0.0120 | 0.0447 ± 0.0178  | 0.0310 ± 0.0082   | 0.0130 ± 0.0020#   |
| Lactobacillales   | 0.0017 ± 0.0006 | 0.0011 ± 0.0004  | 0.0021 ± 0.0003   | 0.0017 ± 0.0003    |

|                     |                 |                  |                  |                              |
|---------------------|-----------------|------------------|------------------|------------------------------|
| Clostridiales       | 0.2989 ± 0.0408 | 0.4149 ± 0.0480  | 0.4132 ± 0.0574  | 0.3532 ± 0.0335              |
| Erysipelotrichales  | 0.0406 ± 0.0105 | 0.0248 ± 0.0070  | 0.0186 ± 0.0085* | 0.0640 ± 0.0254 <sup>§</sup> |
| Desulfovibrionales  | 0.0222 ± 0.0054 | 0.0280 ± 0.0077  | 0.0182 ± 0.0041  | 0.0129 ± 0.0036              |
| Campylobacterales   | 0.0044 ± 0.0029 | 0.0441 ± 0.0396  | 0.0036 ± 0.0031  | 0.0031 ± 0.0020              |
| Enterobacteriales   | 0.0005 ± 0.0001 | 0.0015 ± 0.0007  | 0.0029 ± 0.0018  | 0.0076 ± 0.0064              |
| <b>family</b>       |                 |                  |                  |                              |
| Bacteroidaceae      | 0.0855 ± 0.0172 | 0.0824 ± 0.0185  | 0.0765 ± 0.0202  | 0.0556 ± 0.0087              |
| Porphyromonadaceae  | 0.0130 ± 0.0054 | 0.0295 ± 0.0108  | 0.0533 ± 0.0103* | 0.0385 ± 0.0102              |
| Rikenellaceae       | 0.0525 ± 0.0076 | 0.0320 ± 0.0093  | 0.0427 ± 0.0119  | 0.0559 ± 0.0075              |
| S24-7               | 0.3820 ± 0.0329 | 0.1662 ± 0.0186* | 0.2457 ± 0.0382* | 0.2261 ± 0.0291*             |
| Deferribacteraceae  | 0.0477 ± 0.0120 | 0.0447 ± 0.0178  | 0.0310 ± 0.0082  | 0.0130 ± 0.0020 <sup>#</sup> |
| Lachnospiraceae     | 0.0286 ± 0.0041 | 0.0811 ± 0.0162* | 0.0578 ± 0.0088* | 0.0651 ± 0.0025*             |
| Ruminococcaceae     | 0.0767 ± 0.0142 | 0.1224 ± 0.0179  | 0.1253 ± 0.0205  | 0.1216 ± 0.0155              |
| Erysipelotrichaceae | 0.0406 ± 0.0105 | 0.0248 ± 0.0070  | 0.0186 ± 0.0085* | 0.0640 ± 0.0254 <sup>§</sup> |
| Desulfovibrionaceae | 0.0221 ± 0.0054 | 0.0278 ± 0.0077  | 0.0181 ± 0.0041  | 0.0129 ± 0.0036              |
| Helicobacteraceae   | 0.0044 ± 0.0029 | 0.0441 ± 0.0396  | 0.0036 ± 0.0031  | 0.0031 ± 0.0020              |

**genus**

|                 |                 |                  |                  |                                           |
|-----------------|-----------------|------------------|------------------|-------------------------------------------|
| Oscillospira    | 0.0272 ± 0.0053 | 0.0422 ± 0.0072  | 0.0572 ± 0.0116* | 0.0613 ± 0.0079*                          |
| Parabacteroides | 0.0130 ± 0.0054 | 0.0294 ± 0.0109  | 0.0533 ± 0.0103* | 0.0385 ± 0.0102                           |
| Bacteroides     | 0.0855 ± 0.0172 | 0.0824 ± 0.0185  | 0.0765 ± 0.0202  | 0.0556 ± 0.0087                           |
| Mucispirillum   | 0.0477 ± 0.0120 | 0.0447 ± 0.0178  | 0.0310 ± 0.0082  | 0.0130 ± 0.0020 <sup>#</sup>              |
| Bilophila       | 0.0056 ± 0.0016 | 0.0216 ± 0.0073* | 0.0119 ± 0.0024* | 0.0094 ± 0.0033                           |
| [Ruminococcus]  | 0.0050 ± 0.0010 | 0.0160 ± 0.0042* | 0.0123 ± 0.0025* | 0.0097 ± 0.0008*                          |
| Coprococcus     | 0.0021 ± 0.0007 | 0.0213 ± 0.0087* | 0.0122 ± 0.0024* | 0.0143 ± 0.0018*                          |
| Allobaculum     | 0.0350 ± 0.0075 | 0.0117 ± 0.0057* | 0.0116 ± 0.0053* | 0.0570 ± 0.0231 <sup>#</sup> <sup>§</sup> |
| Odoribacter     | 0.0033 ± 0.0033 | 0.0187 ± 0.0079  | 0.0055 ± 0.0040  | 0.0001 ± 0.0001                           |
| Helicobacter    | 0.0044 ± 0.0029 | 0.0441 ± 0.0396  | 0.0036 ± 0.0031  | 0.0031 ± 0.0020                           |

\*  $p < 0.05$  versus CON group by Mann-Whitney U test

<sup>#</sup>  $p < 0.05$  versus HFD group by Mann-Whitney U test

<sup>§</sup>  $p < 0.05$  versus AGE group by Mann-Whitney U test

UD: under the detection limit, means the values is 0 when detecting.
